# Supplementary material
Source: Springer Nature journal article supplement (https://www.springermedizin.de/resource/supplementary/12957_2012_1109_MOESM4_ESM.pdf/9561878)

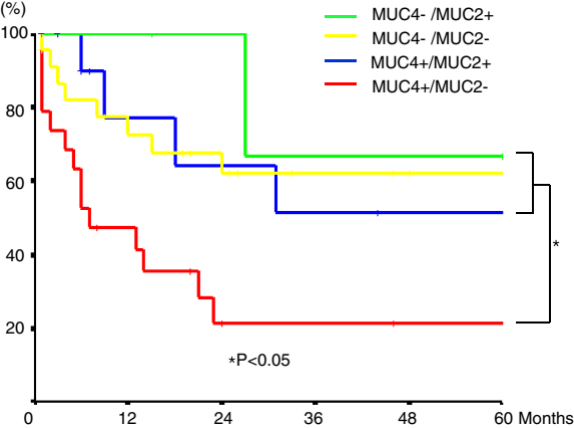

Supplement: MOESM4 [file 9561878]
